# Supplementary material for: Mechanism of lncRNA WARS2-IT1 promoting angiogenesis of glioma through miR-299-3P/VEGFA axis and activating PI3K/AKT signaling pathway
Source: Research Square preprint supplement (doi:10.21203/rs.3.rs-7026304/v1), 2025-07-24
Supplement: Supplementary file 1 [file 265b55b2428001b11d43dd12.docx]

**Fig. 1** **WARS2-IT1 is upregulated in glioma tissues and cells**. A The volcano plot of organizational sequencing results shows that WARS2-IT1 expression is upregulated in tissues. B The heatmap results of the top 50 differentially expressed RNAs in tissue sequencing showed a significant upregulation of WARS2-IT1. C Based on TCGA database from GEPIA（https://www.gepia.cancer-pku.cn/ ）Querying high expression of WARS2-IT1 in human malignant tumors on bioinformatics websites. D Retrieve high expression of WARS2-IT1 in glioma tissue from bioinformatics websites. E Compared to normal brain tissue (10 cases), WARS2-IT1 was significantly elevated in glioma tissue (52 cases) . F Compared to normal brain glial cells HEB, the expression of WARS2-IT1 is significantly increased in glioma cells(verified by log-rank test). All the measurement data were expressed as mean ± standard deviation. The comparison between two groups was analyzed by paired t-test. Data among multiple groups were compared by one-way ANOVA, followed by Tukey’s post hoc test. The experiment was repeated three times (*p < 0.05，**p < 0.001，***p < 0.001).

**Fig.2** **WARS2-IT1 accelerates the development of glioma in vitro**. A Sh-WARS2-IT1#1 showed the highest silencing interference efficiency in the constructed stable cell line T98G and cell line U251 . B The scratch test and cell migration assay results showed that silencing lncRNA WARS2-IT1 significantly inhibited the Migration ability of T98G and U251 cells . C The CCK8，Transwell invasion experiment results shows that silencing lncRNA WARS2-IT1 significantly inhibited the proliferation rate of T98G and U251 cells . D The EDU experiment results showed that silencing lncRNA WARS2-IT1 significantly inhibited the proliferation of T98G and U251 cells. E The results of Tube Formation Assay showed that silencing lncRNA WARS2-IT1 significantly inhibited tubular formation in HBMVEC cells . All the measurement data were expressed as mean ± standard deviation. The comparison between two groups was analyzed by paired t-test. Data among multiple groups were compared by one-way ANOVA, followed by Tukey’s post hoc test. The experiment was repeated three times，(*p < 0.05，**p < 0.01，***p < 0.001).

**Fig. 3** **LncRNA WARS2-IT1 is mainly localized in the cytoplasm of glioma cells**. A Based on lncRNA subcellular localization database lncLocator（http://www.csbio.sjtu.edu.cn/bioinf/）Prediction of subcellular localization of WARS2-IT1 in glioma using lncLocator/bioinformatics website. B The results of RNA nuclear cytoplasmic separation experiments confirm that WARS2-IT1 is mainly expressed in the cytoplasm of T98G and U251 cells （*p < 0.05）. All the measurement data were expressed as mean ± standard deviation. The comparison between two groups was analyzed by paired t-test. Data among multiple groups were compared by one-way ANOVA, followed by Tukey’s post hoc test. The experiment was repeated three times.

**Fig. 4** **WARS2-IT1 regulates VEGFA expression via sponging miR‑299-3p** A Three circles represent the retrieval results from ENCORI and LncBase databases as well as the pre diction results, and the middle part represents the intersection (miR-299-3p, miR-3194-3p and miR-2355-5p). B Compared to normal brain tissue (10 cases), miR-299-3p was significantly reduced in glioma tissue (P<0.05). C Compared to normal brain glial cells HEB, the expression of miR-299-3p in cells was significantly reduced (P<0.05). D Screening of differentially expressed miRNAs using Venn intersection plots in various bioinformatics prediction databases, miR-299-3P showed a negative regulatory relationship with lncRNA WARS2-IT1(P<0.05). E The dual luciferase gene reporter experiment of T98G and U251 cell lines showed that the group co transfected with miR-299-3p and wild-type VEGFA reporter gene plasmid had the lowest fluorescence intensity(P<0.05). All the measurement data were expressed as mean ± standard deviation. The comparison between two groups was analyzed by paired t-test. Data among multiple groups were compared by one-way ANOVA, followed by Tukey’s post hoc test. The experiment was repeated three times，(*p < 0.05，**p < 0.01，***p < 0.001).

**Fig. 5** **Upregulating miR‑299-3p inhibits the migration and proliferation of glioma cells.** A The results of CCK8 proliferation experiment suggest that silencing miR-299-3p accelerates cell proliferation rate, while overexpression of miR-299-3p significantly inhibits cell proliferation ability. B The EDU proliferation experiment results showed that overexpression of miR-299-3p significantly inhibited the proliferation of T98G and U251 cells, while silencing miR-299-3p showed the opposite trend (P<0.05). C The scratch test results showed that overexpression of miR-299-3p significantly inhibited the scratch healing rate of T98G and U251 cells (P<0.05), while inhibition of miR-299-3p showed the opposite trend(P<0.05). D The Transwell migration experiment results showed that overexpression of miR-299-3p significantly inhibited the migration of T98G and U251 cells, while silencing miR-299-3p showed the opposite trend(P<0.05). All the measurement data were expressed as mean ± standard deviation. The comparison between two groups was analyzed by paired t-test. Data among multiple groups were compared by one-way ANOVA, followed by Tukey’s post hoc test. The experiment was repeated three times.

**Fig. 6** **Knockdown of WARS2-IT1 inhibits invasion and increased apoptosis of glioma cells by upregulating miR‑299-3P**. A Overexpression of miR-299-3p significantly promoted the proportion of T98G and U251 cell apoptosis (P<0.05). B The Transwell invasion experiment results showed that overexpression of miR-299-3p significantly inhibited the invasion of T98G and U251 cells, while silencing miR-299-3p showed the opposite trend (P<0.05).C The results of the tubular experiment showed that overexpression of miR-299-3p significantly inhibited tubular formation in HBMVEC cells (P<0.05), while silencing miR-299-3p showed the opposite trend (P<0.05). All the measurement data were expressed as mean ± standard deviation. The comparison between two groups was analyzed by paired t-test. Data among multiple groups were compared by one-way ANOVA, followed by Tukey’s post hoc test. The experiment was repeated three times.

**Fig.7** **Rescue experimental verification of the effects of silencing or overexpression of miR-299-3p on glioma proliferation, invasion, migration, and angiogenesis.** Compared to downregulating lncRNA WARS2-IT1 alone, scratch assay (A) showed a significant decrease in the migration ability of T98G and U251 glioma cells. However, silencing miR-299-3p partially reversed the effect of downregulating lncRNA WARS2-IT1 alone on the migration ability of T98G and U251 glioma cells; (B) Transwell invasion experiments showed that the invasion ability of T98G and U251 glioma cells was significantly weakened, but silencing miR-299-3p partially reversed the effect of downregulating lncRNA WARS2-IT1 alone on the invasion ability of T98G and U251 glioma cells; (C) The tubular formation experiment showed that the tubular formation of HBMVEC in glioma cells was significantly weakened, but at the same time, silencing miR-299-3p partially reversed the effect of downregulating lncRNA WARS2-IT1 alone on the tubular formation ability of glioma endothelial cells. (D) The CCK8 proliferation experiment showed a significant decrease in the proliferation ability of T98G and U251 glioma cells, but silencing miR-299-3p partially reversed the effect of downregulating lncRNA WARS2-IT1 alone on the proliferation ability of T98G and U251 glioma cells; (E) The expression level of VEGFA protein was significantly decreased in T98G and U251 glioma cells, but silencing miR-299-3p partially reversed the effect of downregulating lncRNA WARS2-IT1 alone on the decrease in VEGFA protein expression in glioma cells. All the measurement data were expressed as mean ± standard deviation. The comparison between two groups was analyzed by paired t-test. Data among multiple groups were compared by one-way ANOVA, followed by Tukey’s post hoc test. The experiment was repeated three times.

**Fig. 8 WARS2-IT1 exerts glioma promoter function through the PI3K/AKT pathway**. Western Blot was used to detect the effects of silencing lncRNA WARS2-IT1, miR-299-3p, and overexpression of miR-299-3p on the expression of PI3K, p-PI3K, AKT, p-AKT, Caspase3, Caspase7, Bax, Bcl-2, MMP2, MMP9, VEGFA, and CD34 proteins in T98G and U251 cells (* * P<0.01). NC-sh，NC-sh lncRNA WARS2-IT1； sh lncRNA，sh lncRNA WARS2-IT1.

**Fig. 9 Silencing WARS2-IT1 inhibits the tumorigenic ability of glioma cells in vivo**. A: After 27 days of vaccination, in vivo fluorescence imaging analysis was performed to detect tumor growth in each group of nude mice; B: Tumor formation status of nude mice in each group; C: Anatomical tumor images of sh lncRNA group and sh NC group animals; D: After 27 days of inoculation, the tumor time tumor volume growth curve of tumor bearing nude mice. sh lncRNA，sh lncRNA WARS2-IT1.
